# Supplementary material for: Resistance Training and β-Hydroxy-β-Methylbutyrate for Functional Recovery in Critical Illness: A Multicenter 2×2 Factorial Randomized Trial
Source: Research Square preprint supplement (doi:10.21203/rs.3.rs-7184080/v1), 2025-07-31
Supplement: Supplementary file 2 [file bc8139b2702faffcb0e6a2d0.docx]

Supplementary 2

eTable 1 Resistance training intervention profile

eTable 2 HMB intervention profile

eTable 3 The differences in daily profile among the four groups

eTable 4. Primary outcomes at hospital discharge in participants wth and without resistance training

eTable 5. Primary outcomes at hospital discharge in participants with and without HMB supplementation

eTable 6. Secondary outcomes at any time point in participants with and without resistance training

eTable 7. Secondary outcomes at any time point in participants with and without HMB supplementation

eTable 8 Interaction Effects of Resistance Training and HMB Supplementation

eTable 9. Unadjusted Between-Group Comparisons of Primary and Secondary Outcomes

eTable 10. Adjusted Between-Group Comparisons of Primary and Secondary Outcomes

eTable 1 Resistance training intervention profile

| **Indicators** | **Resistance Training group (N=65)** | **Combination group (N=65)** |
| --- | --- | --- |
| **Number of target completion sessions**[session, M(Q25,Q75)] | 8(7,12) | 9(6.25,12) |
| **Number of actual completion sessions** [session, M(Q25,Q75)] | 8(5,11) | 8(5,10.75) |
| **Compliance rate** [%, M(Q25,Q75)] | 0.93(0.8,1) | 1(0.84,1) |
| **Cumulative session of unfinished interventions**[N(%)] | 149(22.54) | 150(26.50) |
| dropouts [N(%)] | 98(65.8) | 99(66.0) |
| weakness complaints [N(%)] | 22(17.7) | 24(16.1) |
| discomforts such as abdominal bloating and pain [N(%)] | 5(3.4) | 8(5.3) |
| affected by the epidemic [N(%)] | 6(4.0) | 9(6.0) |
| time conflicts, etc.[N(%)] | 18(12.1) | 10(6.6) |
| **Proportion of Training in ICU [Median (Q25, Q75)]** | 0.25(0.13,0.39) | 0.23(0.08,0.5) |
| **Proportion of Training in general ward [Median (Q25, Q75)]** | 0.75(0.59,0.87) | 0.78(0.5,0.93) |
| **Duration per intervention** [min, M(Q25,Q75)] | 20.0(15.73,25.0) | 20.0(15.57,25.0) |
| **Proportion of training in the supine position**[%**,**M(Q25,Q75)] | 0.43(0.27,0.67) | 0.57(0.38,1.0) |
| **Proportion of training in the sitting position**[%**,**M(Q25,Q75)] | 0.38(0.2,0.57) | 0.33(0,0.49) |
| **Proportion of training in the standing position**[%**,**M(Q25,Q75)] | 0(0,0.25) | 0(0,0.15) |
| **Proportion of using anti-body weight**[%**,**M(Q25,Q75)] | 0.5(0.22,0.87) | 0.37(0.13,0.68) |
| **Proportion of using elastic bands** [%**,**M(Q25,Q75)] | 0.5(0.13,0.78) | 0.63(0.32,0.88) |

*Note: Gastrointestinal symptoms were reported in 10 participants (16.7%) in the RT group and 8 (13.6%) in the combined group; these events were deemed unrelated to RT following clinical adjudication.

eTable 2 HMB intervention profile

| **Indicators** | **HMB group (N=69)** | **Combination group (N=65)** |
| --- | --- | --- |
| **Number of target completion days** [day, M(Q25,Q75)] | 12.0(8.0,19.25) | 10.0(7.0,14.0) |
| **Number of actual completion days** [day, M(Q25,Q75)] | 11.0(7.0,17.0) | 8.0(6.0,11.0) |
| **Number of target completion sessions** [session, M(Q25,Q75)] | 24.0(16.0,38.5) | 20.0(14.0,28.0) |
| **Number of actual completion sessions** [session, M(Q25,Q75)] | 22.0(14.0,34.25) | 17.5(12.75,23.25) |
| **Compliance rate** [%, M(Q25,Q75)] | 92.86(88.59,100) | 90.63(85.54,94.0) |
| **Compliance rate≥80%**[N(%)] | 62(98.4) | 56(93.3) |
| **Adverse gastrointestinal effects N(%)** | 9(13.4) | 8(13.6) |
| **Cumulative session of unfinished interventions,** [N(%)] | 158(17.52) | 175(25.36) |
| suspension due to gastrointestinal intolerance | 34(21.52) | 32(18.29) |
| miss taking | 63(39.87) | 56(32.0) |
| withdraw | 27(17.09) | 49(28.0) |
| other | 34(21.52) | 38(21.71) |
| **Analysis of the causes of study protocol deviations**[N(%)] | 158(8.76) | 175(5.49) |
| certainly related to HMB | 0 | 0 |
| possibly related to HMB | 26(16.46) | 31(17.72) |
| possibly unrelated to HMB | 28(17.72) | 22(12.57) |
| certainly unrelated to HMB | 64(40.50) | 78(44.57) |
| unable to judge | 40(25.32) | 44(25.14) |
| **Adverse reactions related to HMB**[N(%)]* | 2(2.90) | 1(1.54) |

Note: Gastrointestinal discomfort was reported in 9 participants (13.4%) in the HMB group and 8 (13.6%) in the combined group, leading to 34 (21.5%) and 32 (18.3%) suspended intervention sessions, respectively. Although a direct causal relationship with HMB could not be confirmed upon clinical team review, hyperglycemia occurred in 2 participants (2.9%) in the HMB group and 1 (1.54%) in the combined group, which was considered possibly related to HMB supplementation.

eTable 3 The differences in daily profile among the four groups

|  | **RT group** | **HMB group** | **Combination group** | **Control group** | **statistics** | ***P* value** |
| --- | --- | --- | --- | --- | --- | --- |
| Adverse gastrointestinal effects N(%) | 10(16.7) | 9(13.4) | 8(13.6) | 12(20.7） | 1.560 | 0.668a |
| Average daily sitting time, min | 21.67(10.5,42.42) | 21.42(8.21,46.0) | 25(11.34,42.50) | 23.33(6.73,39.0) | 0.704 | 0.872b |
| Average daily walking time，min | 13.33(0.50,25.25) | 8.88(0,19.1) | 11.83(0,25.0) | 9.42(0,21.5) | 3.630 | 0.304b |
| Accumulated energy deficiency, kcal | -3955.87(-6996.47,-1697.44) | -3103.0(-6885.0,-172.80) | -3047.0(-6235.0,-746.30) | -3190.50(-5937.25,-52.20) | 2.467 | 0.481b |
| Accumulated protein deficiency, g | -246.4(-381.4,-93.83) | -180.8(-365.6,-72.69) | -181.6(-351.0,-89.73) | -234.2(-329.05,-33.45) | 1.722 | 0.632b |
| The average energy intake per day, kcal | 892.85(744.27,1163.57) | 1000.0(782.83,1257.67) | 1091.67(753.34,1341.20) | 990.14(758.75,1385.53) | 2.767 | 0.429b |
| The average protein intake per day, g | 39.95(29.97,49.35) | 48.5(33.75,60.0) | 48.04(32.73,60.88) | 42.25(30.58,60.21) | 6.909 | 0.075b |
| Delirium [N(%)] | 3(5.0) | 3(4.5) | 4(6.8) | 7(12.1) | 3.331 | 0.343 a |

a: Fisher’s exact test; b: Kruskal-Wallis H test

eTable 4. Primary outcomes at hospital discharge in participants wth and without resistance training

| **Variables** | **Unadjusted (Ls Means)** | | | | **Adjusted (Ls Means)** | | | |
| --- | --- | --- | --- | --- | --- | --- | --- | --- |
| **RT** | **No RT** | **Difference** | ***P*** | **RT** | **No RT** | **Difference** | ***P*** |
| **All_RT** |  |  |  |  |  |  |  |  |
| SPPB, points | 6.828(6.162~7.494) | 5.038(4.397~5.678) | 1.790(0.866~2.714) | **<0.001** | 6.599(5.972~7.226) | 5.282(4.678~5.887) | 1.317(0.439~2.194) | **0.003** |
| 6WMD, m | 208.98(184.80~233.17) | 138.32(115.07~161.57) | 70.664(37.111~104.22) | **<0.001** | 202.04(178.96~225.12) | 145.84(123.58~168.10) | 56.204(23.886~88.522) | **<0.001** |
| **HMB=0** |  |  |  |  |  |  |  |  |
| SPPB, points | 7.230(6.262~8.197) | 4.462(3.524~5.399) | 2.768(1.421~4.115) | **<0.001** | 6.923(6.022~7.824) | 4.808(3.929~5.687) | 2.115(0.829~3.401) | **0.001** |
| 6WMD, m | 220.96(185.61~256.31) | 118.65(84.406~152.89) | 102.31(53.099~151.52) | **<0.001** | 208.77(175.71~241.84) | 132.12(99.870~164.37) | 76.654(29.463~123.84) | **0.001** |
| **HMB=1** |  |  |  |  |  |  |  |  |
| SPPB, points | 6.426(5.510~7.343) | 5.597(4.722~6.472) | 0.829(-0.438~2.096) | 0.198 | 6.307(5.405~7.209) | 5.706(4.846~6.566) | 0.601(-0.657~1.859) | 0.346 |
| 6WMD, m | 197.01(163.85~230.17) | 157.40(125.76~189.05) | 39.604(-6.231~85.439) | 0.090 | 196.46(163.54~229.38) | 157.90(126.52~189.29) | 38.560(-7.351~84.471) | 0.099 |

RT = resistance training; HMB = β-hydroxy-β-methylbutyrate; LS = least squares. Adjusted least-squares means (95% CI) were estimated using linear regression models, controlling for age, sex, BMI, APACHE II score, and duration of mechanical ventilation.

eTable 5. Primary outcomes at hospital discharge in participants with and without HMB supplementation

| **Variables** | **Unadjusted (Ls Means)** | | | | | | | | **Adjusted (Ls Means)** | | | | | | |
| --- | --- | --- | --- | --- | --- | --- | --- | --- | --- | --- | --- | --- | --- | --- | --- |
| **HMB** | | **No HMB** | | **Difference** | | ***P*** | | **HMB** | | **No HMB** | **Difference** | | ***P*** | |
| **All_HMB** | |  | |  | |  |  |  | |  | |  |  | |
| SPPB, points | | 5.992(5.323~6.661) | | 5.802(5.128~6.476) | | 0.191(-0.759~1.140) | 0.693 | 6.056(5.438~6.674) | | 5.775(5.149~6.400) | | 0.282(-0.599~1.162) | 0.529 | |
| 6WMD, m | | 176.28(151.88~200.67) | | 168.18(143.59~192.77) | | 8.099(-26.54~42.737) | 0.646 | 177.97(155.08~200.86) | | 167.80(144.63~190.96) | | 10.170(-22.45~42.788) | 0.540 | |
| **RT=0** | |  | |  | |  |  |  | |  | |  |  | |
| SPPB, points | | 5.597(4.696~6.498) | | 4.462(3.547~5.376) | | 1.135(-0.148~2.419) | 0.083 | 5.620(4.734~6.507) | | 4.491(3.584~5.399) | | 1.129(-0.154~2.412) | 0.084 | |
| 6WMD, m | | 157.40(126.41~188.40) | | 118.65(87.180~150.12) | | 38.756(-5.412~82.925) | 0.085 | 157.06(126.48~187.64) | | 120.86(89.552~152.17) | | 36.200(-8.078~80.479) | 0.108 | |
| **RT=1** | |  | |  | |  |  |  | |  | |  |  | |
| SPPB, points | | 6.426(5.486~7.366) | | 7.230(6.290~8.169) | | -0.803(-2.133~0.526) | 0.234 | 6.649(5.815~7.484) | | 7.006(6.172~7.841) | | -0.357(-1.547~0.833) | 0.554 | |
| 6WMD, m | | 197.01(160.91~233.10) | | 220.96(184.87~257.05) | | -23.95(-74.99~27.093) | 0.355 | 205.25(171.92~238.58) | | 212.72(179.39~246.05) | | -7.469(-54.99~40.049) | 0.756 | |

RT = resistance training; HMB = β-hydroxy-β-methylbutyrate; LS = least squares. Adjusted least-squares means (95% CI) were estimated using linear regression models, controlling for age, sex, BMI, APACHE II score, and duration of mechanical ventilation.

eTable 6. Secondary outcomes at any time point in participants with and without resistance training

| **Variables** | **Unadjusted (Ls Means)** | | | | **Adjusted (Ls Means)** | | | |
| --- | --- | --- | --- | --- | --- | --- | --- | --- |
| **RT** | **No RT** | **Difference** | ***P*** | **RT** | **No RT** | **Difference** | ***P*** |
| **Length of hospital stay after enrollment** | 14.369(12.314~16.424) | 15.162(13.153~17.171) | -0.793(-3.666~2.081) | 0.588 | 14.255(12.172~16.339) | 15.271(13.234~17.307) | -1.016(-3.952~1.921) | 0.497 |
| **1-month mortality** | 3(1.14) | 11(4.17) | 0.522(0.273~1.001) | 0.050 | 3(1.14) | 11(4.17) | 0.566(0.291~1.102) | 0.094 |
| **6-month mortality** | 5(1.95) | 21(8.17) | 0.473(0.286~0.784) | **0.004** | 5(1.95) | 21(8.17) | 0.513(0.308~0.857) | **0.011** |
| **12-month mortality** | 6(2.51) | 23(9.62) | 0.511(0.320~0.817) | **0.005** | 6(2.51) | 23(9.62) | 0.549(0.340~0.887) | **0.014** |
| **Handgrip, kg** |  |  |  |  |  |  |  |  |
| Baseline | 16.621(14.938~18.304) | 15.844(14.218~17.471) | 0.777(-1.563~3.117) | 0.514 | 16.022(14.510~17.535) | 16.593(15.124~18.062) | -0.571(-2.695~1.553) | 0.597 |
| ICU discharge | 20.479(18.686~22.272) | 17.332(15.597~19.067) | 3.147(0.653~5.642) | **0.013** | 19.890(18.340~21.440) | 18.111(16.603~19.620) | 1.779(-0.400~3.957) | 0.109 |
| Hospital discharge | 24.004(22.020~25.988) | 19.500(17.591~21.410) | 4.503(1.750~7.257) | **0.001** | 23.432(21.741~25.123) | 20.245(18.612~21.879) | 3.187(0.821~5.552) | **0.008** |
| **MRC**, points |  |  |  |  |  |  |  |  |
| Baseline | 47.678(46.242~49.113) | 45.689(44.296~47.082) | 1.988(-0.012~3.989) | 0.051 | 47.049(45.753~48.345) | 46.349(45.086~47.612) | 0.700(-1.120~2.520) | 0.450 |
| ICU discharge | 50.093(48.626~51.560) | 46.835(45.408~48.263) | 3.258(1.211~5.304) | **0.001** | 49.458(48.176~50.739) | 47.443(46.190~48.696) | 2.015(0.212~3.818) | **0.028** |
| Hospital discharge | 55.290(53.626~56.953) | 52.604(50.998~54.211) | 2.686(0.373~4.998) | **0.023** | 54.665(53.210~56.121) | 53.116(51.707~54.525) | 1.549(-0.486~3.585) | 0.135 |
| **FS-14,** points |  |  |  |  |  |  |  |  |
| Baseline | 9.137(8.487~9.786) | 9.657(9.026~10.289) | -0.521(-1.427~0.385) | 0.259 | 9.291(8.671~9.912) | 9.415(8.809~10.022) | -0.124(-0.994~0.747) | 0.780 |
| ICU discharge | 7.958(7.365~8.552) | 8.840(8.258~9.422) | -0.882(-1.713~-0.050) | **0.037** | 8.113(7.550~8.675) | 8.614(8.058~9.169) | -0.501(-1.295~0.293) | 0.216 |
| Hospital discharge | 5.758(5.186~6.329) | 7.161(6.608~7.714) | -1.404(-2.199~-0.608) | **<0.001** | 5.918(5.377~6.459) | 6.979(6.452~7.505) | -1.061(-1.819~-0.302) | **0.006** |
| 1-month follow up | 4.084(3.503~4.664) | 5.262(4.688~5.836) | -1.178(-1.995~-0.362) | **0.004** | 4.250(3.696~4.803) | 5.040(4.490~5.590) | -0.790(-1.573~-0.006) | **0.048** |
| 6-month follow up | 3.318(2.635~4.001) | 3.895(3.222~4.568) | -0.577(-1.536~0.382) | 0.238 | 3.522(2.860~4.184) | 3.724(3.068~4.379) | -0.202(-1.136~0.733) | 0.672 |
| **PQSI,** points |  |  |  |  |  |  |  |  |
| Baseline | 9.044(8.182~9.906) | 9.525(8.693~10.357) | -0.481(-1.679~0.717) | 0.431 | 9.148(8.288~10.008) | 9.326(8.492~10.160) | -0.178(-1.379~1.024) | 0.772 |
| ICU discharge | 9.758(8.989~10.526) | 10.742(9.991~11.492) | -0.984(-2.058~0.090) | 0.072 | 9.861(9.097~10.625) | 10.593(9.843~11.343) | -0.732(-1.806~0.342) | 0.181 |
| Hospital discharge | 7.375(6.669~8.080) | 8.865(8.187~9.543) | -1.491(-2.469~-0.512) | **0.002** | 7.486(6.789~8.184) | 8.764(8.090~9.437) | -1.277(-2.251~-0.304) | **0.010** |
| 1-month follow up | 5.342(4.652~6.032) | 6.403(5.720~7.085) | -1.061(-2.031~-0.090) | **0.032** | 5.463(4.787~6.140) | 6.213(5.541~6.886) | -0.750(-1.708~0.207) | 0.124 |
| 6-month follow up | 4.972(4.169~5.774) | 5.462(4.675~6.249) | -0.490(-1.614~0.634) | 0.392 | 5.123(4.339~5.908) | 5.392(4.621~6.163) | -0.268(-1.371~0.835) | 0.633 |
| **FFM,** kg |  |  |  |  |  |  |  |  |
| Baseline | 51.220(49.715~52.726) | 49.459(47.998~50.921) | 1.761(-0.337~3.859) | 0.100 | 51.122(50.061~52.182) | 49.816(48.785~50.848) | 1.305(-0.185~2.796) | 0.086 |
| One week | 48.739(47.189~50.289) | 48.863(47.356~50.371) | -0.125(-2.287~2.038) | 0.910 | 48.590(47.466~49.714) | 49.209(48.113~50.306) | -0.619(-2.200~0.962) | 0.441 |
| Two weeks | 49.747(47.693~51.802) | 47.779(46.030~49.528) | 1.968(-0.731~4.666) | 0.152 | 49.645(47.891~51.398) | 48.121(46.712~49.531) | 1.523(-0.733~3.779) | 0.185 |
| Hospital discharge | 49.404(47.760~51.048) | 47.985(46.396~49.574) | 1.420(-0.867~3.706) | 0.223 | 49.276(48.025~50.526) | 48.307(47.099~49.515) | 0.969(-0.779~2.717) | 0.276 |
| **ASMM, kg** |  |  |  |  |  |  |  |  |
| Baseline | 19.337(18.651~20.023) | 18.733(18.067~19.399) | 0.604(-0.351~1.560) | 0.214 | 19.244(18.747~19.742) | 18.929(18.445~19.413) | 0.316(-0.383~1.015) | 0.375 |
| One week | 18.685(18.000~19.370) | 18.311(17.645~18.977) | 0.374(-0.581~1.330) | 0.442 | 18.571(18.073~19.070) | 18.505(18.019~18.991) | 0.066(-0.635~0.767) | 0.853 |
| Two weeks | 18.913(18.047~19.779) | 18.021(17.278~18.765) | 0.892(-0.250~2.033) | 0.125 | 18.820(18.095~19.546) | 18.212(17.625~18.800) | 0.608(-0.329~1.545) | 0.203 |
| Hospital discharge | 19.065(18.378~19.752) | 17.772(17.108~18.436) | 1.293(0.337~2.248) | **0.008** | 18.946(18.443~19.450) | 17.950(17.463~18.436) | 0.997(0.292~1.701) | **0.005** |
| **SMI** |  |  |  |  |  |  |  |  |
| Baseline | 9.445(9.124~9.767) | 9.323(9.011~9.635) | 0.122(-0.326~0.571) | 0.591 | 9.412(9.152~9.671) | 9.409(9.156~9.662) | 0.003(-0.362~0.368) | 0.987 |
| One week | 9.052(8.728~9.376) | 8.980(8.665~9.296) | 0.072(-0.380~0.524) | 0.755 | 9.006(8.748~9.265) | 9.062(8.810~9.315) | -0.056(-0.420~0.308) | 0.762 |
| Two weeks | 9.361(8.887~9.835) | 8.778(8.393~9.163) | 0.584(-0.027~1.194) | 0.061 | 9.336(8.909~9.763) | 8.859(8.528~9.190) | 0.477(-0.064~1.018) | 0.084 |
| Hospital discharge | 9.248(8.909~9.587) | 8.682(8.355~9.009) | 0.565(0.094~1.036) | **0.018** | 9.198(8.929~9.466) | 8.769(8.511~9.028) | 0.428(0.053~0.803) | **0.025** |
| **PhA** |  |  |  |  |  |  |  |  |
| Baseline | 5.205(5.033~5.377) | 5.036(4.868~5.203) | 0.169(-0.071~0.409) | 0.167 | 5.131(4.966~5.297) | 5.093(4.931~5.254) | 0.039(-0.194~0.271) | 0.743 |
| One week | 5.241(5.073~5.408) | 5.066(4.902~5.229) | 0.175(-0.060~0.409) | 0.143 | 5.167(5.009~5.326) | 5.128(4.973~5.283) | 0.039(-0.183~0.262) | 0.728 |
| Two weeks | 5.071(4.805~5.337) | 5.012(4.804~5.220) | 0.059(-0.278~0.397) | 0.731 | 5.005(4.749~5.262) | 5.067(4.870~5.265) | -0.062(-0.386~0.262) | 0.707 |
| Hospital discharge | 5.312(5.140~5.484) | 5.076(4.910~5.241) | 0.237(-0.002~0.475) | 0.051 | 5.239(5.083~5.395) | 5.122(4.972~5.272) | 0.117(-0.101~0.335) | 0.291 |
| **MMSE, points** |  |  |  |  |  |  |  |  |
| Baseline | 21.956(20.804~23.109) | 20.767(19.653~21.881) | 1.189(-0.413~2.792) | 0.145 | 21.586(20.523~22.649) | 21.181(20.150~22.212) | 0.405(-1.085~1.896) | 0.592 |
| ICU discharge | 24.006(22.996~25.016) | 22.015(21.037~22.993) | 1.991(0.585~3.397) | **0.005** | 23.636(22.711~24.561) | 22.411(21.513~23.309) | 1.225(-0.074~2.524) | 0.065 |
| Hospital discharge | 26.060(25.118~27.001) | 24.806(23.909~25.704) | 1.253(-0.048~2.554) | 0.059 | 25.697(24.827~26.566) | 25.175(24.346~26.005) | 0.522(-0.691~1.734) | 0.397 |
| **HADS-A, points** |  |  |  |  |  |  |  |  |
| Baseline | 9.001(8.136~9.866) | 9.054(8.215~9.892) | -0.052(-1.257~1.152) | 0.932 | 9.065(8.213~9.916) | 8.929(8.099~9.760) | 0.135(-1.056~1.327) | 0.824 |
| ICU discharge | 7.064(6.335~7.792) | 7.779(7.061~8.498) | -0.716(-1.739~0.307) | 0.170 | 7.127(6.410~7.844) | 7.703(6.991~8.414) | -0.575(-1.587~0.437) | 0.265 |
| Hospital discharge | 4.318(3.689~4.947) | 4.910(4.301~5.520) | -0.593(-1.469~0.283) | 0.185 | 4.381(3.759~5.003) | 4.857(4.251~5.464) | -0.476(-1.347~0.395) | 0.283 |
| 1-month follow up | 3.856(3.283~4.428) | 4.920(4.348~5.492) | -1.064(-1.873~-0.255) | **0.010** | 3.930(3.357~4.503) | 4.798(4.223~5.373) | -0.868(-1.683~-0.054) | **0.036** |
| 6-month follow up | 2.154(1.498~2.810) | 2.152(1.509~2.795) | 0.001(-0.917~0.920) | 0.998 | 2.259(1.591~2.927) | 2.067(1.411~2.722) | 0.193(-0.746~1.131) | 0.687 |
| **HADS-D, points** |  |  |  |  |  |  |  |  |
| Baseline | 9.367(8.520~10.213) | 9.968(9.147~10.789) | -0.601(-1.781~0.578) | 0.317 | 9.475(8.646~10.304) | 9.739(8.930~10.548) | -0.264(-1.425~0.898) | 0.656 |
| ICU discharge | 7.450(6.713~8.186) | 8.579(7.852~9.306) | -1.130(-2.165~-0.095) | **0.032** | 7.558(6.837~8.280) | 8.435(7.718~9.151) | -0.877(-1.896~0.143) | 0.092 |
| Hospital discharge | 4.523(3.855~5.190) | 6.014(5.366~6.662) | -1.491(-2.422~-0.561) | **0.001** | 4.638(3.981~5.294) | 5.895(5.254~6.536) | -1.258(-2.178~-0.337) | **0.007** |
| 1-month follow up | 3.977(3.337~4.617) | 4.945(4.306~5.584) | -0.968(-1.872~-0.064) | **0.035** | 4.100(3.465~4.735) | 4.760(4.123~5.397) | -0.660(-1.563~0.243) | 0.152 |
| 6-month follow up | 2.620(1.871~3.368) | 2.529(1.795~3.263) | 0.091(-0.957~1.139) | 0.865 | 2.801(2.050~3.553) | 2.400(1.660~3.139) | 0.402(-0.656~1.459) | 0.456 |
| **IESR, points** |  |  |  |  |  |  |  |  |
| 1-month follow up | 22.342(20.974~23.710) | 23.447(22.102~24.791) | -1.105(-3.022~0.813) | 0.257 | 22.556(21.197~23.915) | 23.301(21.953~24.649) | -0.745(-2.671~1.180) | 0.446 |
| 6-month follow up | 18.295(16.755~19.835) | 18.910(17.396~20.424) | -0.615(-2.775~1.544) | 0.575 | 18.592(17.059~20.124) | 18.649(17.134~20.164) | -0.057(-2.226~2.112) | 0.959 |
| **SF-36, points** |  |  |  |  |  |  |  |  |
| 1-month follow up | 537.50(466.88~608.12) | 458.67(390.37~526.97) | 78.826(-19.42~177.07) | 0.075 | 522.09(484.68~559.50) | 471.85(435.51~508.19) | 50.236(-2.293~102.77) | 0.061 |
| 6-month follow up | 613.18(504.32~722.04) | 552.61(449.92~655.31) | 60.570(-89.09~210.23) | 0.224 | 597.55(556.85~638.25) | 568.63(530.08~607.19) | 28.918(-27.58~85.417) | 0.314 |

RT = resistance training; LS mean = least squares mean; MRC = Medical Research Council muscle strength scale; IMS = ICU Mobility Scale; FSS-ICU = Functional Status Score for the ICU; FS-14 = Fatigue Scale–14; PSQI = Pittsburgh Sleep Quality Index. FFM = fat-free mass; ASMM = appendicular skeletal muscle mass; SMI = skeletal muscle index; PhA = phase angle; MMSE = Mini-Mental State Examination; HADS-A = Hospital Anxiety and Depression Scale–Anxiety subscale; HADS-D = Hospital Anxiety and Depression Scale–Depression subscale. IES-R = Impact of Event Scale–Revised; SF-36 = Short Form–36 Health Survey.

Adjusted LS means (95% CI) were estimated using linear mixed-effects models, controlling for age, sex, BMI, APACHE II score, and duration of mechanical ventilation.

eTable 7. Secondary outcomes at any time point in participants with and without HMB supplementation

| **Variables** | **Unadjusted (Ls Means)** | | | | **Adjusted (Ls Means)** | | | |
| --- | --- | --- | --- | --- | --- | --- | --- | --- |
| **HMB** | **No HMB** | **Difference** | ***P*** | **HMB** | **No HMB** | **Difference** | ***P*** |
| **Length of hospital stay after enrollment** | 14.067(12.046~16.089) | 15.492(13.456~17.529) | -1.425(-4.295~1.444) | 0.329 | 14.165(12.126~16.205) | 15.393(13.337~17.448) | -1.227(-4.131~1.676) | 0.406 |
| **1-month mortality** | 6(2.27) | 8(3.03) | 0.845(0.491~1.456) | 0.545 | 6(2.27) | 8(3.03) | 0.884(0.504~1.549) | 0.667 |
| **6-month mortality** | 13(5.06) | 13(5.06) | 0.979(0.652~1.468) | 0.917 | 13(5.06) | 13(5.06) | 0.990(0.652~1.505) | 0.963 |
| **12-month mortality** | 14(5.86) | 15(6.28) | 0.975(0.661~1.438) | 0.900 | 14(5.86) | 15(6.28) | 0.984(0.656~1.475) | 0.936 |
| **Handgrip, kg** |  |  |  |  |  |  |  |  |
| Baseline | 15.812(14.177~17.447) | 16.614(14.941~18.286) | -0.802(-3.141~1.537) | 0.500 | 16.004(14.544~17.464) | 16.612(15.109~18.116) | -0.608(-2.708~1.491) | 0.569 |
| ICU discharge | 17.894(16.135~19.654) | 19.874(18.077~21.670) | -1.979(-4.494~0.536) | 0.122 | 18.080(16.577~19.582) | 19.940(18.396~21.484) | -1.860(-4.018~0.298) | 0.091 |
| Hospital discharge | 21.179(19.211~23.146) | 22.177(20.168~24.185) | -0.998(-3.810~1.813) | 0.485 | 21.378(19.723~23.032) | 22.214(20.515~23.912) | -0.836(-3.210~1.539) | 0.489 |
| **MRC**, points |  |  |  |  |  |  |  |  |
| Baseline | 46.318(44.901~47.735) | 46.986(45.553~48.419) | -0.668(-2.683~1.348) | 0.515 | 46.344(45.079~47.609) | 47.037(45.753~48.321) | -0.693(-2.498~1.111) | 0.450 |
| ICU discharge | 48.178(46.727~49.628) | 48.671(47.193~50.149) | -0.493(-2.564~1.578) | 0.639 | 48.184(46.933~49.435) | 48.685(47.404~49.967) | -0.502(-2.295~1.292) | 0.582 |
| Hospital discharge | 54.755(53.122~56.389) | 53.016(51.349~54.683) | 1.739(-0.595~4.073) | 0.144 | 54.772(53.361~56.182) | 52.918(51.471~54.365) | 1.854(-0.169~3.877) | 0.072 |
| **FS-14,** points |  |  |  |  |  |  |  |  |
| Baseline | 9.427(8.787~10.067) | 9.387(8.739~10.034) | 0.041(-0.870~0.951) | 0.930 | 9.361(8.753~9.968) | 9.349(8.731~9.966) | 0.012(-0.854~0.879) | 0.978 |
| ICU discharge | 8.526(7.942~9.110) | 8.280(7.680~8.881) | 0.245(-0.592~1.083) | 0.565 | 8.462(7.913~9.012) | 8.258(7.690~8.825) | 0.204(-0.586~0.995) | 0.612 |
| Hospital discharge | 6.019(5.461~6.578) | 6.979(6.403~7.555) | -0.960(-1.762~-0.158) | **0.019** | 5.949(5.426~6.472) | 7.018(6.476~7.560) | -1.069(-1.823~-0.315) | **0.005** |
| 1-month follow up | 4.322(3.747~4.896) | 5.072(4.482~5.662) | -0.750(-1.574~0.073) | 0.074 | 4.236(3.695~4.776) | 5.092(4.534~5.649) | -0.856(-1.633~-0.079) | **0.030** |
| 6-month follow up | 3.453(2.784~4.122) | 3.796(3.102~4.491) | -0.343(-1.308~0.621) | 0.485 | 3.385(2.745~4.025) | 3.888(3.218~4.557) | -0.503(-1.429~0.424) | 0.287 |
| **PQSI,** points |  |  |  |  |  |  |  |  |
| Baseline | 8.831(7.986~9.677) | 9.760(8.909~10.610) | -0.928(-2.127~0.271) | 0.129 | 8.809(7.967~9.651) | 9.675(8.825~10.525) | -0.866(-2.063~0.331) | 0.156 |
| ICU discharge | 10.218(9.467~10.970) | 10.296(9.522~11.070) | -0.077(-1.156~1.001) | 0.888 | 10.195(9.450~10.939) | 10.261(9.490~11.031) | -0.066(-1.138~1.006) | 0.904 |
| Hospital discharge | 7.933(7.248~8.619) | 8.372(7.665~9.080) | -0.439(-1.424~0.546) | 0.382 | 7.905(7.231~8.578) | 8.401(7.703~9.099) | -0.496(-1.467~0.474) | 0.315 |
| 1-month follow up | 5.643(4.958~6.328) | 6.127(5.430~6.825) | -0.484(-1.462~0.493) | 0.331 | 5.607(4.940~6.273) | 6.090(5.408~6.772) | -0.483(-1.437~0.471) | 0.320 |
| 6-month follow up | 4.864(4.079~5.650) | 5.610(4.798~6.423) | -0.746(-1.876~0.384) | 0.195 | 4.861(4.101~5.620) | 5.699(4.908~6.490) | -0.839(-1.935~0.258) | 0.134 |
| **FFM,** kg |  |  |  |  |  |  |  |  |
| Baseline | 50.298(48.818~51.778) | 50.334(48.842~51.827) | -0.036(-2.138~2.066) | 0.973 | 50.522(49.485~51.559) | 50.384(49.334~51.433) | 0.139(-1.339~1.616) | 0.854 |
| One week | 48.926(47.400~50.453) | 48.655(47.113~50.197) | 0.271(-1.898~2.441) | 0.806 | 49.126(48.026~50.227) | 48.659(47.542~49.776) | 0.467(-1.103~2.037) | 0.559 |
| Two weeks | 49.094(47.226~50.961) | 48.059(46.171~49.947) | 1.035(-1.621~3.691) | 0.444 | 49.373(47.835~50.910) | 48.019(46.461~49.578) | 1.354(-0.838~3.546) | 0.225 |
| Hospital discharge | 48.936(47.327~50.546) | 48.395(46.765~50.025) | 0.541(-1.750~2.833) | 0.642 | 49.152(47.941~50.362) | 48.383(47.148~49.618) | 0.768(-0.963~2.500) | 0.383 |
| **ASMM, kg** |  |  |  |  |  |  |  |  |
| Baseline | 19.136(18.462~19.809) | 18.914(18.235~19.593) | 0.221(-0.735~1.178) | 0.649 | 19.241(18.756~19.727) | 18.919(18.428~19.410) | 0.322(-0.369~1.013) | 0.359 |
| One week | 18.548(17.872~19.223) | 18.427(17.745~19.109) | 0.121(-0.839~1.080) | 0.805 | 18.644(18.157~19.131) | 18.418(17.924~18.912) | 0.226(-0.468~0.920) | 0.522 |
| Two weeks | 18.690(17.898~19.482) | 18.175(17.374~18.975) | 0.515(-0.611~1.641) | 0.369 | 18.832(18.194~19.469) | 18.131(17.485~18.777) | 0.701(-0.208~1.610) | 0.130 |
| Hospital discharge | 18.472(17.792~19.152) | 18.313(17.624~19.002) | 0.159(-0.809~1.127) | 0.747 | 18.568(18.076~19.060) | 18.286(17.785~18.788) | 0.282(-0.421~0.986) | 0.431 |
| **SMI** |  |  |  |  |  |  |  |  |
| Baseline | 9.306(8.991~9.621) | 9.460(9.142~9.777) | -0.154(-0.601~0.294) | 0.500 | 9.343(9.089~9.596) | 9.478(9.222~9.735) | -0.136(-0.497~0.226) | 0.461 |
| One week | 8.922(8.603~9.241) | 9.106(8.784~9.428) | -0.184(-0.637~0.269) | 0.426 | 8.957(8.705~9.210) | 9.111(8.854~9.367) | -0.154(-0.514~0.207) | 0.403 |
| Two weeks | 9.021(8.602~9.439) | 9.008(8.584~9.432) | 0.013(-0.582~0.609) | 0.966 | 9.086(8.720~9.451) | 8.996(8.626~9.367) | 0.090(-0.432~0.611) | 0.736 |
| Hospital discharge | 8.915(8.581~9.249) | 8.990(8.650~9.329) | -0.074(-0.551~0.402) | 0.759 | 8.953(8.691~9.214) | 8.996(8.728~9.265) | -0.044(-0.419~0.331) | 0.819 |
| **PhA** |  |  |  |  |  |  |  |  |
| Baseline | 5.115(4.946~5.284) | 5.121(4.950~5.292) | -0.006(-0.247~0.235) | 0.962 | 5.120(4.958~5.282) | 5.103(4.939~5.267) | 0.017(-0.213~0.248) | 0.882 |
| One week | 5.173(5.008~5.339) | 5.127(4.959~5.294) | 0.047(-0.189~0.282) | 0.697 | 5.179(5.025~5.334) | 5.114(4.957~5.271) | 0.066(-0.155~0.286) | 0.558 |
| Two weeks | 5.223(4.994~5.452) | 4.884(4.652~5.115) | 0.339(0.014~0.665) | **0.041** | 5.235(5.017~5.452) | 4.868(4.647~5.088) | 0.367(0.057~0.677) | **0.020** |
| Hospital discharge | 5.243(5.076~5.411) | 5.132(4.961~5.303) | 0.111(-0.128~0.351) | 0.362 | 5.249(5.099~5.399) | 5.103(4.949~5.256) | 0.146(-0.068~0.361) | 0.181 |
| **MMSE, points** |  |  |  |  |  |  |  |  |
| Baseline | 21.454(20.322~22.587) | 21.219(20.073~22.365) | 0.236(-1.376~1.847) | 0.773 | 21.558(20.524~22.592) | 21.188(20.140~22.236) | 0.371(-1.103~1.844) | 0.621 |
| ICU discharge | 22.946(21.950~23.943) | 23.010(22.002~24.017) | -0.063(-1.480~1.354) | 0.930 | 23.051(22.149~23.952) | 22.956(22.044~23.867) | 0.095(-1.188~1.377) | 0.884 |
| Hospital discharge | 25.832(24.915~26.749) | 24.968(24.031~25.905) | 0.864(-0.447~2.175) | 0.195 | 25.926(25.094~26.758) | 24.908(24.055~25.761) | 1.018(-0.175~2.210) | 0.094 |
| **HADS-A, points** |  |  |  |  |  |  |  |  |
| Baseline | 8.441(7.595~9.287) | 9.622(8.768~10.475) | -1.181(-2.383~0.021) | 0.054 | 8.426(7.593~9.258) | 9.572(8.729~10.415) | -1.146(-2.331~0.039) | 0.058 |
| ICU discharge | 7.722(7.010~8.434) | 7.087(6.356~7.818) | 0.635(-0.385~1.656) | 0.222 | 7.709(7.009~8.409) | 7.077(6.355~7.798) | 0.632(-0.373~1.638) | 0.217 |
| Hospital discharge | 4.440(3.831~5.049) | 4.806(4.180~5.432) | -0.366(-1.240~0.508) | 0.411 | 4.422(3.821~5.023) | 4.831(4.211~5.450) | -0.409(-1.272~0.455) | 0.353 |
| 1-month follow up | 4.239(3.673~4.806) | 4.541(3.965~5.118) | -0.302(-1.110~0.506) | 0.463 | 4.216(3.652~4.780) | 4.512(3.935~5.089) | -0.296(-1.103~0.512) | 0.472 |
| 6-month follow up | 1.818(1.179~2.457) | 2.516(1.855~3.178) | -0.698(-1.618~0.222) | 0.137 | 1.811(1.165~2.457) | 2.548(1.874~3.222) | -0.737(-1.670~0.196) | 0.121 |
| **HADS-D, points** |  |  |  |  |  |  |  |  |
| Baseline | 9.366(8.532~10.201) | 9.990(9.149~10.832) | -0.624(-1.810~0.561) | 0.302 | 9.301(8.487~10.116) | 9.922(9.098~10.747) | -0.621(-1.780~0.538) | 0.293 |
| ICU discharge | 8.112(7.385~8.839) | 7.914(7.167~8.661) | 0.198(-0.844~1.241) | 0.709 | 8.050(7.341~8.758) | 7.930(7.199~8.661) | 0.120(-0.899~1.138) | 0.818 |
| Hospital discharge | 5.040(4.386~5.693) | 5.551(4.879~6.223) | -0.511(-1.448~0.426) | 0.284 | 4.974(4.336~5.613) | 5.605(4.946~6.264) | -0.631(-1.549~0.288) | 0.178 |
| 1-month follow up | 4.282(3.644~4.919) | 4.658(4.008~5.307) | -0.376(-1.286~0.534) | 0.417 | 4.206(3.577~4.834) | 4.666(4.023~5.309) | -0.460(-1.360~0.440) | 0.316 |
| 6-month follow up | 2.439(1.708~3.170) | 2.719(1.963~3.476) | -0.281(-1.333~0.771) | 0.601 | 2.395(1.667~3.124) | 2.816(2.057~3.576) | -0.421(-1.474~0.632) | 0.433 |
| **IESR, points** |  |  |  |  |  |  |  |  |
| 1-month follow up | 22.755(21.413~24.096) | 23.060(21.684~24.437) | -0.306(-2.228~1.616) | 0.754 | 22.701(21.369~24.033) | 23.172(21.806~24.538) | -0.471(-2.382~1.440) | 0.627 |
| 6-month follow up | 18.818(17.316~20.319) | 18.383(16.825~19.942) | 0.434(-1.730~2.599) | 0.692 | 18.762(17.277~20.248) | 18.466(16.916~20.016) | 0.296(-1.854~2.447) | 0.786 |
| **SF-36, points** |  |  |  |  |  |  |  |  |
| 1-month follow up | 508.52(438.43~578.60) | 484.45(412.58~556.33) | 24.069(-76.32~124.46) | 0.411 | 511.73(475.40~548.07) | 479.99(442.78~517.20) | 31.745(-20.35~83.838) | 0.231 |
| 6-month follow up | 590.91(486.52~695.29) | 572.27(464.13~680.40) | 18.640(-131.7~168.94) | 0.647 | 593.31(554.59~632.02) | 571.19(530.97~611.42) | 22.112(-33.83~78.054) | 0.437 |

HMB = β-hydroxy-β-methylbutyrate; LS mean = least squares mean; MRC = Medical Research Council muscle strength scale; IMS = ICU Mobility Scale; FSS-ICU = Functional Status Score for the ICU; FS-14 = Fatigue Scale–14; PSQI = Pittsburgh Sleep Quality Index. FFM = fat-free mass; ASMM = appendicular skeletal muscle mass; SMI = skeletal muscle index; PhA = phase angle; MMSE = Mini-Mental State Examination; HADS-A = Hospital Anxiety and Depression Scale–Anxiety subscale; HADS-D = Hospital Anxiety and Depression Scale–Depression subscale. IES-R = Impact of Event Scale–Revised; SF-36 = Short Form–36 Health Survey.

Adjusted LS means (95% CI) were estimated using linear mixed-effects models, controlling for age, sex, BMI, APACHE II score, and duration of mechanical ventilation.

eTable 8 Interaction Effects of Resistance Training and HMB Supplementation

| **Variables** | **Unadjusted** | | **Adjusted** | |
| --- | --- | --- | --- | --- |
| **F** | ***P*** | **F** | ***P*** |
| SPPB, points | 4.309 | **0.038** | 3.296 | 0.071 |
| 6WMD, m | 3.409 | 0.066 | 2.147 | 0.144 |
| Handgrip, kg | 0.564 | 0.454 | 0.147 | 0.701 |
| MRC, points | 1.117 | 0.292 | 0.064 | 0.800 |
| FS-14, points | 1.085 | 0.298 | 0.056 | 0.812 |
| PQSI, points | 1.158 | 0.282 | 0.279 | 0.597 |
| FFM, kg | 0.095 | 0.758 | 0.316 | 0.575 |
| ASMM, kg | 0.414 | 0.520 | 0.000 | 0.984 |
| SMI | 0.416 | 0.519 | 0.038 | 0.846 |
| PhA | 0.009 | 0.925 | 0.771 | 0.380 |
| MMSE, points | 2.276 | 0.133 | 2.205 | 0.139 |
| HADS-A, points | 0.012 | 0.912 | 0.431 | 0.512 |
| HADS-D, points | 0.234 | 0.629 | 0.142 | 0.771 |
| IESR, points | 1.133 | 0.289 | 0.551 | 0.458 |
| SF36, points | 1.265 | 0.378 | 0.005 | 0.945 |

SPPB = Short Physical Performance Battery; 6MWD = 6-Minute Walk Distance; Handgrip = Handgrip strength; MRC = Medical Research Council muscle strength scale; FS-14 = Fatigue Scale–14; PSQI = Pittsburgh Sleep Quality Index. FFM = Fat-free mass; ASMM = Appendicular skeletal muscle mass; SMI = Skeletal muscle index; PhA = Phase angle; MMSE = Mini-Mental State Examination. HADS-A = Hospital Anxiety and Depression Scale–Anxiety subscale; HADS-D = Hospital Anxiety and Depression Scale–Depression subscale; IES-R = Impact of Event Scale–Revised; SF-36 = Short Form–36 Health Survey. Adjusted for age, sex, BMI, APACHE II score, and duration of mechanical ventilation.

eTable 9. Unadjusted Between-Group Comparisons of Primary and Secondary Outcomes

| **Variables** | **RT vs Control**  **LS mean difference** | **P** | **HMB vs Control**  **LS mean difference** | **P** | **Combined vs Control**  **LS mean difference** | **P** | **HMB vs RT**  **LS mean difference** | **P** | **Combined vs RT**  **LS mean difference** | **P** | **Combined vs HMB**  **LS mean difference** | **P** |
| --- | --- | --- | --- | --- | --- | --- | --- | --- | --- | --- | --- | --- |
| **SPPB score** | 2.768(1.463~4.073) | **<0.001** | 1.135(-0.139~2.410) | 0.081 | 1.965(0.659~3.270) | **0.003** | -1.632(-2.928~-0.337) | **0.013** | -0.803(-2.129~0.523) | 0.234 | 0.829(-0.467~2.125) | 0.209 |
| **6WMD, m** | 102.31(54.840~149.78) | **<0.001** | 38.756(-7.605~85.118) | 0.101 | 78.361(30.890~125.83) | 0.001 | -63.55(-110.7~-16.43) | **0.008** | -23.95(-72.17~24.268) | 0.329 | 39.604(-7.523~86.731) | 0.099 |
| **Length of hospital stay after enrollment** | -1.546(-5.613~2.520) | 0.457 | -2.152(-6.159~1.854) | 0.293 | -2.223(-6.289~1.844) | 0.285 | -0.606(-4.644~3.431) | 0.769 | -0.677(-4.774~3.420) | 0.746 | -0.071(-4.108~3.967) | 0.973 |
| **1-month mortality** | 0.138(0.017~1.158) | 0.068 | 0.527(0.147~1.893) | 0.326 | 0.272(0.054~1.362) | 0.113 | 3.815(0.415~35.085) | 0.237 | 1.968(0.174~22.266) | 0.584 | 0.516(0.091~2.917) | 0.454 |
| **6-month mortality** | 0.076(0.010~0.606)* | **0.015** | 0.698(0.273~1.788) | 0.454 | **0.300**(0.091~0.986)* | **0.047** | 9.155(1.124~74.578)* | **0.039** | 3.933(0.427~36.236) | 0.227 | 0.430(0.125~1.473) | 0.179 |
| **12-month mortality** | 0.148(0.032~0.689)* | **0.015** | 0.755(0.304~1.873) | 0.544 | 0.314(0.096~1.026) | 0.055 | 5.094(1.065~24.358)* | **0.041** | 2.118(0.372~12.065) | 0.398 | 0.416(0.123~1.410) | 0.159 |
| **Handgrip, kg** |  |  |  |  |  |  |  |  |  |  |  |  |
| Baseline | 1.262(-2.087~4.612) | 0.459 | -0.352(-3.608~2.904) | 0.831 | -0.050(-3.367~3.267) | 0.976 | -1.615(-4.922~1.692) | 0.337 | -1.313(-4.680~2.055) | 0.443 | 0.302(-2.973~3.577) | 0.856 |
| ICU discharge | 4.905(1.339~8.470) | **0.007** | -0.257(-3.728~3.215) | 0.884 | 1.177(-2.363~4.718) | 0.513 | -5.161(-8.680~-1.643) | **0.004** | -3.727(-7.313~-0.141) | **0.041** | 1.434(-2.059~4.927) | 0.419 |
| Hospital discharge | 4.239(0.295~8.183) | **0.035** | -1.175(-5.005~2.655) | 0.546 | 3.557(-0.354~7.469) | 0.074 | -5.414(-9.312~-1.515) | **0.006** | -0.682(-4.660~3.296) | 0.736 | 4.732(0.867~8.597) | **0.016** |
| **MRC**, points |  |  |  |  |  |  |  |  |  |  |  |  |
| Baseline | 2.581(-0.265~5.427) | 0.075 | -0.095(-2.883~2.693) | 0.947 | 1.310(-1.525~4.145) | 0.364 | -2.676(-5.502~0.150) | 0.063 | -1.271(-4.143~1.600) | 0.384 | 1.405(-1.410~4.219) | 0.327 |
| ICU discharge | 4.806(1.885~7.728) | **0.001** | 1.043(-1.813~3.900) | 0.473 | 2.793(-0.122~5.708) | 0.060 | -3.763(-6.638~-0.888) | **0.010** | -2.013(-4.946~0.920) | 0.178 | 1.750(-1.119~4.618) | 0.231 |
| Hospital discharge | 3.445(0.147~6.743) | **0.040** | 2.486(-0.722~5.695) | 0.128 | 4.464(1.187~7.741) | **0.007** | -0.958(-4.212~2.296) | 0.562 | 1.019(-2.302~4.341) | 0.546 | 1.978(-1.255~5.210) | 0.229 |
| **FS-14,** points |  |  |  |  |  |  |  |  |  |  |  |  |
| Baseline | -1.057(-2.348~0.233) | 0.108 | -0.476(-1.740~0.788) | 0.460 | -0.471(-1.755~0.814) | 0.472 | 0.582(-0.699~1.863) | 0.373 | 0.587(-0.714~1.888) | 0.376 | 0.005(-1.270~1.280) | 0.994 |
| ICU discharge | -1.150(-2.342~0.042) | 0.059 | -0.037(-1.203~1.129) | 0.950 | -0.629(-1.818~0.560) | 0.299 | 1.113(-0.050~2.276) | 0.061 | 0.521(-0.665~1.708) | 0.389 | -0.592(-1.752~0.568) | 0.317 |
| Hospital discharge | -1.491(-2.631~-0.352) | .010 | -1.053(-2.158~0.052) | 0.062 | -2.385(-3.513~-1.258) | **<0.001** | 0.438(-0.680~1.556) | 0.442 | -0.894(-2.035~0.247) | 0.124 | -1.332(-2.438~-0.226) | **0.018** |
| 1-month follow up | -1.624(-2.790~-0.458) | .006 | -1.185(-2.329~-0.040) | .042 | -1.955(-3.112~-0.799) | **<0.001** | 0.439(-0.706~1.585) | 0.452 | -0.331(-1.489~0.827) | 0.575 | -0.771(-1.907~0.366) | 0.183 |
| 6-month follow up | -0.897(-2.276~0.482) | 0.202 | -0.649(-1.995~0.697) | 0.344 | -0.912(-2.291~0.467) | 0.194 | 0.248(-1.080~1.576) | 0.714 | -0.015(-1.377~1.346) | 0.982 | -0.263(-1.592~1.065) | 0.697 |
| **PQSI,** points |  |  |  |  |  |  |  |  |  |  |  |  |
| Baseline | -0.575(-2.275~1.124) | 0.506 | -1.001(-2.666~0.664) | 0.238 | -1.420(-3.129~0.290) | 0.103 | -0.425(-2.106~1.256) | 0.620 | -0.844(-2.569~0.881) | 0.337 | -0.419(-2.110~1.273) | 0.627 |
| ICU discharge | -0.711(-2.255~0.833) | 0.366 | 0.153(-1.353~1.659) | 0.842 | -1.063(-2.611~0.486) | 0.178 | 0.863(-0.633~2.360) | 0.258 | -0.352(-1.891~1.187) | 0.653 | -1.215(-2.716~0.285) | 0.112 |
| Hospital discharge | -1.840(-3.247~-0.432) | **0.010** | -0.770(-2.127~0.588) | 0.266 | -1.934(-3.321~-0.547) | **0.006** | 1.070(-0.315~2.455) | 0.130 | -0.094(-1.508~1.320) | 0.896 | -1.164(-2.528~0.200) | 0.094 |
| 1-month follow up | -1.782(-3.166~-0.397) | **0.011** | -1.195(-2.561~0.170) | 0.086 | -1.572(-2.960~-0.184) | **0.026** | 0.587(-0.769~1.942) | 0.396 | 0.210(-1.169~1.588) | 0.765 | -0.377(-1.736~0.982) | 0.586 |
| 6-month follow up | -1.236(-2.848~0.375) | 0.132 | -1.433(-3.005~0.139) | 0.074 | -1.272(-2.887~0.342) | 0.122 | -0.197(-1.754~1.360) | 0.804 | -0.036(-1.635~1.564) | 0.965 | 0.161(-1.399~1.721) | 0.839 |
| **FFM,** kg |  |  |  |  |  |  |  |  |  |  |  |  |
| Baseline | 1.055(-1.934~4.044) | 0.488 | -0.698(-3.631~2.235) | 0.640 | 1.749(-1.240~4.737) | 0.251 | -1.753(-4.718~1.212) | 0.246 | 0.694(-2.327~3.714) | 0.652 | 2.447(-0.518~5.412) | 0.105 |
| One week | -0.100(-3.184~2.985) | 0.949 | 0.276(-2.751~3.303) | 0.858 | 0.138(-2.945~3.222) | 0.930 | 0.376(-2.680~3.432) | 0.809 | 0.238(-2.874~3.350) | 0.881 | -0.138(-3.193~2.917) | 0.929 |
| Two weeks | 2.368(-1.464~6.200) | 0.225 | 1.287(-2.226~4.800) | 0.471 | 2.928(-0.945~6.800) | 0.138 | -1.081(-4.872~2.711) | 0.575 | 0.560(-3.567~4.686) | 0.790 | 1.640(-2.192~5.473) | 0.400 |
| Hospital discharge | 1.644(-1.621~4.908) | 0.323 | 0.742(-2.448~3.932) | 0.647 | 1.970(-1.285~5.224) | 0.235 | -0.902(-4.137~2.334) | 0.584 | 0.326(-2.973~3.625) | 0.846 | 1.228(-1.997~4.453) | 0.454 |
| **ASMM, kg** |  |  |  |  |  |  |  |  |  |  |  |  |
| Baseline | 0.240(-1.120~1.599) | 0.729 | -0.127(-1.461~1.208) | 0.852 | 0.839(-0.521~2.199) | 0.226 | -0.366(-1.716~0.983) | 0.593 | 0.599(-0.775~1.974) | 0.392 | 0.966(-0.383~2.315) | 0.160 |
| One week | -0.107(-1.468~1.254) | 0.878 | -0.346(-1.682~0.990) | 0.611 | 0.499(-0.862~1.859) | 0.472 | -0.239(-1.588~1.110) | 0.727 | 0.605(-0.768~1.979) | 0.387 | 0.844(-0.504~2.193) | 0.219 |
| Two weeks | 1.046(-0.573~2.665) | 0.204 | 0.532(-0.960~2.023) | 0.483 | 1.289(-0.346~2.924) | 0.122 | -0.514(-2.117~1.088) | 0.528 | 0.242(-1.494~1.979) | 0.784 | 0.757(-0.862~2.375) | 0.358 |
| Hospital discharge | 1.108(-0.255~2.472) | 0.111 | -0.020(-1.353~1.313) | 0.976 | 1.463(0.104~2.823) | **0.034** | -1.128(-2.480~0.223) | 0.101 | 0.355(-1.023~1.733) | 0.613 | 1.483(0.136~2.831) | **0.031** |
| **SMI** |  |  |  |  |  |  |  |  |  |  |  |  |
| Baseline | -0.087(-0.725~0.550) | 0.788 | -0.354(-0.979~0.272) | 0.267 | -0.028(-0.666~0.609) | 0.931 | -0.266(-0.899~0.366) | 0.408 | 0.059(-0.585~0.703) | 0.856 | 0.326(-0.306~0.958) | 0.311 |
| One week | -0.050(-0.695~0.595) | 0.879 | -0.301(-0.934~0.332) | 0.351 | -0.113(-0.757~0.532) | 0.731 | -0.251(-0.889~0.387) | 0.440 | -0.063(-0.713~0.587) | 0.849 | 0.188(-0.450~0.826) | 0.563 |
| Two weeks | 0.498(-0.369~1.365) | 0.259 | -0.069(-0.842~0.705) | 0.861 | 0.609(-0.270~1.488) | 0.174 | -0.567(-1.423~0.290) | 0.194 | 0.112(-0.841~1.065) | 0.818 | 0.678(-0.191~1.547) | 0.126 |
| Hospital discharge | 0.500(-0.175~1.174) | 0.146 | -0.137(-0.794~0.519) | 0.681 | 0.494(-0.177~1.164) | 0.149 | -0.637(-1.304~0.030) | 0.061 | -0.006(-0.687~0.675) | 0.986 | 0.631(-0.033~1.295) | 0.062 |
| **PhA** |  |  |  |  |  |  |  |  |  |  |  |  |
| Baseline | 0.081(-0.261~0.423) | 0.640 | -0.088(-0.424~0.247) | 0.605 | 0.166(-0.176~0.508) | 0.341 | -0.170(-0.509~0.169) | 0.325 | 0.084(-0.261~0.430) | 0.631 | 0.254(-0.085~0.593) | 0.141 |
| One week | 0.137(-0.198~0.471) | 0.422 | 0.010(-0.318~0.339) | 0.950 | 0.223(-0.111~0.557) | 0.190 | -0.126(-0.457~0.204) | 0.453 | 0.086(-0.250~0.423) | 0.614 | 0.213(-0.118~0.543) | 0.207 |
| Two weeks | -0.065(-0.542~0.412) | 0.789 | 0.241(-0.175~0.658) | 0.255 | 0.453(-0.032~0.939) | 0.067 | 0.306(-0.165~0.777) | 0.202 | 0.518(-0.014~1.051) | 0.056 | 0.212(-0.267~0.691) | 0.385 |
| Hospital discharge | 0.332(-0.008~0.673) | 0.056 | 0.200(-0.131~0.530) | 0.236 | 0.348(0.010~0.686) | **0.043** | -0.133(-0.469~0.204) | 0.439 | 0.016(-0.328~0.359) | 0.929 | 0.148(-0.186~0.482) | 0.383 |
| **MMSE, points** |  |  |  |  |  |  |  |  |  |  |  |  |
| Baseline | 1.993(-0.237~4.223) | 0.080 | 1.054(-1.070~3.179) | 0.329 | 1.431(-0.796~3.658) | 0.207 | -0.939(-3.165~1.287) | 0.407 | -0.562(-2.808~1.683) | 0.622 | 0.377(-1.847~2.600) | 0.739 |
| ICU discharge | 3.133(1.170~5.095) | **0.001** | 1.118(-0.753~2.989) | 0.240 | 1.976(-0.013~3.965) | 0.052 | -2.015(-3.934~-0.095) | **0.039** | -1.157(-3.126~0.812) | 0.248 | 0.858(-1.089~2.805) | 0.386 |
| Hospital discharge | 1.903(0.072~3.735) | **0.041** | 1.513(-0.224~3.250) | 0.087 | 2.165(0.329~4.000) | **0.021** | -0.391(-2.185~1.404) | 0.668 | 0.261(-1.586~2.108) | 0.781 | 0.652(-1.146~2.450) | 0.476 |
| **HADS-A, points** |  |  |  |  |  |  |  |  |  |  |  |  |
| Baseline | -0.082(-1.793~1.629) | 0.925 | -1.199(-2.876~0.479) | 0.161 | -1.243(-2.953~0.466) | 0.154 | -1.117(-2.815~0.582) | 0.197 | -1.161(-2.892~0.569) | 0.188 | -0.045(-1.742~1.652) | 0.959 |
| ICU discharge | -0.118(-1.581~1.345) | 0.874 | 1.152(-0.283~2.588) | 0.115 | -0.044(-1.506~1.418) | 0.953 | 1.271(-0.156~2.697) | 0.081 | 0.074(-1.379~1.527) | 0.920 | -1.197(-2.622~0.228) | 0.100 |
| Hospital discharge | -0.473(-1.723~0.777) | 0.457 | -0.265(-1.481~0.951) | 0.669 | -0.970(-2.216~0.276) | 0.127 | 0.208(-1.014~1.430) | 0.738 | -0.497(-1.749~0.755) | 0.436 | -0.705(-1.923~0.513) | 0.256 |
| 1-month follow up | -1.491(-2.641~-0.342) | **0.011** | -0.742(-1.881~0.397) | 0.201 | -1.395(-2.544~-0.246) | **0.017** | 0.749(-0.381~1.879) | 0.193 | 0.096(-1.044~1.236) | 0.869 | -0.653(-1.782~0.476) | 0.257 |
| 6-month follow up | 0.247(-1.074~1.567) | 0.714 | -0.431(-1.719~0.858) | 0.512 | -0.723(-2.053~0.606) | 0.286 | -0.678(-1.946~0.591) | 0.295 | -0.970(-2.281~0.340) | 0.147 | -0.293(-1.571~0.985) | 0.653 |
| **HADS-D, points** |  |  |  |  |  |  |  |  |  |  |  |  |
| Baseline | -1.296(-2.972~0.381) | 0.130 | -1.290(-2.934~0.354) | 0.124 | -1.218(-2.893~0.457) | 0.154 | 0.006(-1.659~1.670) | 0.995 | 0.078(-1.617~1.773) | 0.928 | 0.072(-1.591~1.735) | 0.932 |
| ICU discharge | -0.967(-2.453~0.518) | 0.201 | 0.314(-1.144~1.771) | 0.673 | -0.919(-2.403~0.565) | 0.225 | 1.281(-0.166~2.729) | 0.083 | 0.049(-1.425~1.523) | 0.948 | -1.233(-2.679~0.213) | 0.095 |
| Hospital discharge | -1.541(-2.875~-0.206) | **0.023** | -0.585(-1.884~0.713) | 0.376 | -2.035(-3.365~-0.706) | **0.002** | 0.955(-0.349~2.260) | 0.151 | -0.495(-1.830~0.841) | 0.467 | -1.450(-2.749~-0.150) | **0.028** |
| 1-month follow up | -1.316(-2.608~-0.023) | **0.046** | -0.733(-2.012~0.547) | 0.261 | -1.370(-2.662~-0.079) | **0.037** | 0.583(-0.687~1.853) | 0.367 | -0.054(-1.336~1.227) | 0.934 | -0.638(-1.906~0.631) | 0.324 |
| 6-month follow up | 0.017(-1.495~1.530) | 0.982 | -0.326(-1.802~1.151) | 0.665 | -0.174(-1.698~1.349) | 0.822 | -0.343(-1.796~1.110) | 0.643 | -0.192(-1.692~1.308) | 0.802 | 0.151(-1.312~1.615) | 0.839 |
| **IESR, points** |  |  |  |  |  |  |  |  |  |  |  |  |
| 1-month follow up | -2.810(-5.561~-0.060) | **0.045** | -1.959(-4.653~0.736) | 0.153 | -1.449(-4.188~1.291) | 0.298 | 0.851(-1.843~3.546) | 0.534 | 1.362(-1.377~4.101) | 0.328 | 0.510(-2.172~3.193) | 0.708 |
| 6-month follow up | -0.255(-3.370~2.861) | 0.872 | 0.747(-2.291~3.786) | 0.628 | -0.161(-3.275~2.954) | 0.919 | 1.002(-2.003~4.007) | 0.511 | 0.094(-2.988~3.176) | 0.952 | -0.908(-3.912~2.096) | 0.552 |
| **SF-36, points** |  |  |  |  |  |  |  |  |  |  |  |  |
| 1-month follow up | 105.75(-34.89~246.39) | 0.084 | 49.460(-87.11~186.03) | 0.260 | 102.68(-36.19~241.55) | 0.086 | -56.29(-195.2~82.648) | 0.223 | -3.071(-144.3~138.13) | 0.934 | 53.222(-83.93~190.37) | 0.237 |
| 6-month follow up | 73.464(-142.6~289.53) | 0.281 | 31.163(-175.3~237.64) | 0.583 | 79.508(-135.0~294.00) | 0.252 | -42.30(-253.0~168.41) | 0.479 | 6.044(-212.5~224.61) | 0.916 | 48.346(-160.7~257.44) | 0.425 |

RT=resistance training; HMB = β-hydroxy-β-methylbutyrate; LS mean = least squares mean; MRC = Medical Research Council muscle strength scale; IMS = ICU Mobility Scale; FSS-ICU = Functional Status Score for the ICU; FS-14 = Fatigue Scale–14; PSQI = Pittsburgh Sleep Quality Index. FFM = fat-free mass; ASMM = appendicular skeletal muscle mass; SMI = skeletal muscle index; PhA = phase angle; MMSE = Mini-Mental State Examination; HADS-A = Hospital Anxiety and Depression Scale–Anxiety subscale; HADS-D = Hospital Anxiety and Depression Scale–Depression subscale. IES-R = Impact of Event Scale–Revised; SF-36 = Short Form–36 Health Survey.

eTable 10. Adjusted Between-Group Comparisons of Primary and Secondary Outcomes

| **Variables** | **RT vs Control**  **LS mean difference** | ***P*** | **HMB vs Control**  **LS mean difference** | ***P*** | **Combined vs Control**  **LS mean difference** | ***P*** | **HMB vs RT**  **LS mean difference** | ***P*** | **Combined vs RT**  **LS mean difference** | ***P*** | **Combined vs HMB**  **LS mean difference** | ***P*** |
| --- | --- | --- | --- | --- | --- | --- | --- | --- | --- | --- | --- | --- |
| **SPPB score** | 2.149(0.893~3.404) | **<0.001** | 1.074(-0.139~2.286) | 0.083 | 1.607(0.375~2.839) | **0.010** | -1.075(-2.302~0.152) | 0.086 | -0.542(-1.790~0.706) | 0.393 | 0.533(-0.688~1.754) | 0.391 |
| **6WMD, m** | 80.994(34.647~127.34) | **<0.001** | 33.846(-10.92~78.611) | 0.138 | 66.719(21.250~112.19) | **0.004** | -47.15(-92.42~-1.873) | **0.041** | -14.27(-60.32~31.767) | 0.542 | 32.873(-12.19~77.934) | 0.152 |
| **Length of hospital stay after enrollment** | -1.657(-5.851~2.538) | 0.440 | -1.845(-5.937~2.248) | 0.378 | -2.245(-6.362~1.873) | 0.286 | -0.188(-4.313~3.937) | 0.929 | -0.588(-4.743~3.566) | 0.782 | -0.400(-4.498~3.698) | 0.848 |
| **1-month mortality** | 0.182(0.021~1.604) | 0.125 | 0.625(0.164~2.378) | 0.491 | 0.329(0.063~1.722) | 0.188 | 3.434(0.366~32.211) | 0.280 | 1.809(0.155~21.056) | 0.636 | 0.527(0.090~3.079) | 0.477 |
| **6-month mortality** | **0.094(0.012~0.768)*** | **0.027** | 0.734(0.276~1.952) | 0.535 | 0.347(0.103~1.173) | 0.089 | 7.770(0.943~64.042) | 0.057 | 3.679(0.394~34.382) | 0.253 | 0.473(0.136~1.650) | 0.241 |
| **12-month mortality** | **0.175(0.036~0.844)*** | **0.030** | 0.769(0.295~2.003) | 0.590 | 0.355(0.105~1.207) | 0.097 | 4.401(0.901~21.500) | 0.067 | 2.034(0.347~11.909) | 0.431 | 0.462(0.133~1.606) | 0.225 |
| **Handgrip, kg** |  |  |  |  |  |  |  |  |  |  |  |  |
| Baseline | -0.482(-3.566~2.602) | 0.758 | -0.556(-3.518~2.406) | 0.712 | -1.198(-4.193~1.797) | 0.431 | -0.074(-3.062~2.915) | 0.961 | -0.716(-3.741~2.309) | 0.641 | -0.642(-3.580~2.296) | 0.667 |
| ICU discharge | 3.131(-0.021~6.284) | 0.052 | -0.525(-3.560~2.510) | 0.733 | -0.049(-3.124~3.025) | 0.975 | -3.657(-6.710~-0.603) | **0.019** | -3.181(-6.277~-0.085) | **0.044** | 0.476(-2.538~3.489) | 0.756 |
| Hospital discharge | 2.541(-0.885~5.967) | 0.145 | -1.375(-4.667~1.916) | 0.411 | 2.425(-0.919~5.770) | 0.154 | -3.916(-7.247~-0.586) | **0.021** | -0.115(-3.501~3.270) | 0.947 | 3.801(0.516~7.086) | **0.023** |
| **MRC**, points |  |  |  |  |  |  |  |  |  |  |  |  |
| Baseline | 0.492(-2.127~3.110) | 0.712 | -0.898(-3.442~1.646) | 0.487 | 0.003(-2.568~2.574) | 0.998 | -1.390(-3.952~1.172) | 0.286 | -0.489(-3.081~2.104) | 0.711 | 0.902(-1.639~3.442) | 0.485 |
| ICU discharge | 2.793(0.186~5.400) | **0.035** | 0.288(-2.237~2.814) | 0.822 | 1.551(-1.012~4.115) | 0.234 | -2.505(-5.025~0.016) | 0.051 | -1.242(-3.805~1.321) | 0.341 | 1.263(-1.242~3.768) | 0.322 |
| Hospital discharge | 1.569(-1.362~4.500) | 0.293 | 1.876(-0.952~4.704) | 0.193 | 3.455(0.579~6.332) | **0.018** | 0.307(-2.546~3.160) | 0.832 | 1.886(-1.018~4.790) | 0.202 | 1.579(-1.243~4.402) | 0.271 |
| **FS-14,** points |  |  |  |  |  |  |  |  |  |  |  |  |
| Baseline | -0.378(-1.630~0.874) | 0.554 | -0.235(-1.453~0.984) | 0.705 | -0.101(-1.335~1.133) | 0.872 | 0.143(-1.086~1.371) | 0.819 | 0.277(-0.968~1.522) | 0.663 | 0.134(-1.086~1.354) | 0.829 |
| ICU discharge | -0.489(-1.638~0.659) | 0.403 | 0.190(-0.926~1.306) | 0.738 | -0.279(-1.413~0.854) | 0.629 | 0.679(-0.428~1.786) | 0.229 | 0.210(-0.916~1.337) | 0.714 | -0.469(-1.570~0.632) | 0.403 |
| Hospital discharge | -0.895(-1.990~0.201) | 0.109 | -0.919(-1.971~0.134) | 0.087 | -2.149(-3.219~-1.079) | **<0.001** | -0.024(-1.086~1.038) | 0.965 | -1.254(-2.335~-0.174) | **0.022** | -1.230(-2.276~-0.184) | **0.021** |
| 1-month follow up | -0.963(-2.087~0.162) | 0.093 | -1.024(-2.120~0.072) | 0.067 | -1.666(-2.769~-0.564) | .003 | -0.062(-1.156~1.032) | 0.912 | -0.704(-1.805~0.398) | 0.210 | -0.642(-1.722~0.438) | 0.244 |
| 6-month follow up | -0.280(-1.628~1.068) | 0.684 | -0.566(-1.874~0.742) | 0.396 | -0.681(-2.019~0.657) | 0.318 | -0.286(-1.572~1.000) | 0.662 | -0.401(-1.716~0.914) | 0.550 | -0.115(-1.396~1.167) | 0.860 |
| **PQSI,** points |  |  |  |  |  |  |  |  |  |  |  |  |
| Baseline | -0.023(-1.739~1.693) | 0.979 | -0.695(-2.369~0.979) | 0.415 | -1.054(-2.769~0.660) | 0.228 | -0.672(-2.353~1.009) | 0.433 | -1.031(-2.753~0.691) | 0.240 | -0.359(-2.047~1.329) | 0.676 |
| ICU discharge | -0.242(-1.800~1.316) | 0.760 | 0.372(-1.139~1.883) | 0.629 | -0.790(-2.339~0.759) | 0.317 | 0.614(-0.878~2.107) | 0.419 | -0.548(-2.079~0.984) | 0.483 | -1.162(-2.655~0.331) | 0.127 |
| Hospital discharge | -1.439(-2.853~-0.025) | **0.046** | -0.651(-2.004~0.702) | 0.345 | -1.780(-3.158~-0.403) | **0.011** | 0.788(-0.586~2.162) | 0.260 | -0.341(-1.741~1.058) | 0.632 | -1.129(-2.478~0.219) | 0.101 |
| 1-month follow up | -1.208(-2.585~0.169) | 0.086 | -0.932(-2.280~0.417) | 0.175 | -1.256(-2.621~0.110) | 0.071 | 0.276(-1.059~1.612) | 0.685 | -0.048(-1.401~1.306) | 0.945 | -0.324(-1.657~1.010) | 0.634 |
| 6-month follow up | -0.838(-2.428~0.753) | 0.301 | -1.343(-2.884~0.198) | 0.088 | -1.139(-2.720~0.442) | 0.158 | -0.505(-2.030~1.019) | 0.516 | -0.301(-1.862~1.260) | 0.705 | 0.204(-1.316~1.724) | 0.792 |
| **FFM,** kg |  |  |  |  |  |  |  |  |  |  |  |  |
| Baseline | 1.353(-0.799~3.506) | 0.217 | 0.195(-1.890~2.281) | 0.854 | 1.464(-0.647~3.574) | 0.173 | -1.158(-3.253~0.938) | 0.278 | 0.111(-2.014~2.235) | 0.918 | 1.268(-0.815~3.352) | 0.232 |
| One week | 0.167(-2.115~2.449) | 0.886 | 1.190(-1.025~3.404) | 0.291 | -0.165(-2.405~2.076) | 0.885 | 1.023(-1.196~3.241) | 0.365 | -0.332(-2.580~1.917) | 0.772 | -1.354(-3.560~0.852) | 0.228 |
| Two weeks | 2.689(-0.526~5.905) | 0.101 | 2.314(-0.527~5.155) | 0.110 | 2.792(-0.442~6.025) | 0.090 | -0.375(-3.526~2.776) | 0.815 | 0.102(-3.414~3.619) | 0.954 | 0.477(-2.714~3.668) | 0.769 |
| Hospital discharge | 1.977(-0.537~4.491) | 0.123 | 1.711(-0.715~4.138) | 0.166 | 1.749(-0.715~4.214) | 0.164 | -0.266(-2.718~2.187) | 0.831 | -0.228(-2.722~2.266) | 0.857 | 0.038(-2.390~2.466) | 0.975 |
| **ASMM, kg** |  |  |  |  |  |  |  |  |  |  |  |  |
| Baseline | 0.251(-0.757~1.258) | 0.624 | 0.259(-0.718~1.236) | 0.602 | 0.642(-0.347~1.631) | 0.203 | 0.008(-0.974~0.990) | 0.987 | 0.391(-0.605~1.387) | 0.440 | 0.383(-0.594~1.359) | 0.441 |
| One week | -0.119(-1.131~0.892) | 0.817 | 0.039(-0.942~1.021) | 0.937 | 0.284(-0.708~1.277) | 0.574 | 0.159(-0.825~1.142) | 0.751 | 0.403(-0.593~1.400) | 0.426 | 0.245(-0.733~1.222) | 0.623 |
| Two weeks | 1.081(-0.256~2.418) | 0.113 | 1.014(-0.171~2.200) | 0.093 | 1.181(-0.160~2.521) | 0.084 | -0.067(-1.375~1.242) | 0.920 | 0.099(-1.356~1.554) | 0.893 | 0.166(-1.157~1.489) | 0.805 |
| Hospital discharge | 1.117(0.100~2.135) | **0.031** | 0.396(-0.583~1.376) | 0.427 | 1.286(0.292~2.279) | **0.011** | -0.721(-1.711~0.268) | 0.153 | 0.168(-0.837~1.174) | 0.742 | 0.890(-0.089~1.868) | 0.075 |
| **SMI** |  |  |  |  |  |  |  |  |  |  |  |  |
| Baseline | -0.098(-0.624~0.427) | 0.713 | -0.232(-0.743~0.278) | 0.371 | -0.135(-0.652~0.382) | 0.608 | -0.134(-0.646~0.379) | 0.607 | -0.037(-0.557~0.483) | 0.890 | 0.097(-0.413~0.607) | 0.708 |
| One week | -0.079(-0.604~0.447) | 0.768 | -0.176(-0.687~0.334) | 0.497 | -0.215(-0.732~0.301) | 0.412 | -0.098(-0.609~0.413) | 0.707 | -0.137(-0.654~0.381) | 0.604 | -0.039(-0.547~0.469) | 0.880 |
| Two weeks | 0.476(-0.296~1.248) | 0.226 | 0.091(-0.579~0.760) | 0.790 | 0.582(-0.197~1.361) | 0.143 | -0.385(-1.142~0.372) | 0.318 | 0.106(-0.752~0.965) | 0.808 | 0.492(-0.277~1.260) | 0.209 |
| Hospital discharge | 0.455(-0.089~0.999) | 0.101 | -0.017(-0.540~0.505) | 0.948 | 0.386(-0.145~0.917) | 0.154 | -0.473(-1.002~0.057) | 0.080 | -0.070(-0.608~0.469) | 0.799 | 0.403(-0.119~0.925) | 0.130 |
| **PhA** |  |  |  |  |  |  |  |  |  |  |  |  |
| Baseline | -0.137(-0.471~0.196) | 0.419 | -0.149(-0.474~0.175) | 0.366 | 0.054(-0.275~0.383) | 0.747 | -0.012(-0.338~0.314) | 0.941 | 0.191(-0.140~0.522) | 0.257 | 0.203(-0.121~0.528) | 0.219 |
| One week | -0.093(-0.414~0.227) | 0.568 | -0.061(-0.372~0.251) | 0.701 | 0.102(-0.213~0.418) | 0.524 | 0.032(-0.280~0.344) | 0.839 | 0.195(-0.121~0.511) | 0.225 | 0.163(-0.147~0.473) | 0.302 |
| Two weeks | -0.296(-0.757~0.164) | 0.206 | 0.174(-0.224~0.572) | 0.391 | 0.369(-0.096~0.834) | 0.119 | 0.470(0.019~0.921) | **0.041** | 0.665(0.152~1.178) | **0.011** | 0.195(-0.263~0.654) | 0.403 |
| Hospital discharge | 0.134(-0.180~0.448) | 0.403 | 0.161(-0.140~0.462) | 0.293 | 0.261(-0.045~0.567) | 0.094 | 0.028(-0.278~0.333) | 0.859 | 0.128(-0.183~0.438) | 0.419 | 0.100(-0.201~0.401) | 0.513 |
| **MMSE, points** |  |  |  |  |  |  |  |  |  |  |  |  |
| Baseline | 1.112(-0.979~3.203) | 0.296 | 1.067(-0.920~3.054) | 0.291 | 0.787(-1.283~2.858) | 0.454 | -0.045(-2.113~2.022) | 0.965 | -0.325(-2.403~1.753) | 0.758 | -0.279(-2.337~1.778) | 0.789 |
| ICU discharge | 2.302(0.477~4.127) | **0.013** | 1.174(-0.560~2.908) | 0.183 | 1.366(-0.468~3.199) | 0.143 | -1.128(-2.896~0.640) | 0.210 | -0.936(-2.742~0.870) | 0.308 | 0.192(-1.596~1.979) | 0.833 |
| Hospital discharge | 1.080(-0.637~2.797) | 0.216 | 1.546(-0.069~3.162) | 0.061 | 1.590(-0.109~3.290) | 0.066 | 0.466(-1.198~2.130) | 0.582 | 0.510(-1.194~2.214) | 0.556 | 0.044(-1.614~1.703) | 0.958 |
| **HADS-A, points** |  |  |  |  |  |  |  |  |  |  |  |  |
| Baseline | 0.317(-1.382~2.017) | 0.714 | -0.961(-2.622~0.701) | 0.257 | -1.014(-2.704~0.676) | 0.239 | -1.278(-2.952~0.397) | 0.135 | -1.331(-3.034~0.372) | 0.125 | -0.053(-1.724~1.617) | 0.950 |
| ICU discharge | 0.213(-1.242~1.667) | 0.774 | 1.326(-0.096~2.747) | 0.068 | 0.114(-1.330~1.558) | 0.877 | 1.113(-0.293~2.519) | 0.121 | -0.099(-1.529~1.332) | 0.892 | -1.212(-2.614~0.191) | 0.090 |
| Hospital discharge | -0.200(-1.449~1.049) | 0.753 | -0.161(-1.369~1.048) | 0.794 | -0.886(-2.121~0.349) | 0.159 | 0.040(-1.172~1.251) | 0.949 | -0.686(-1.924~0.552) | 0.277 | -0.726(-1.930~0.478) | 0.237 |
| 1-month follow up | -1.089(-2.252~0.075) | 0.067 | -0.538(-1.685~0.610) | 0.358 | -1.182(-2.335~-0.029) | **0.044** | 0.551(-0.583~1.685) | 0.341 | -0.093(-1.233~1.047) | 0.872 | -0.644(-1.774~0.485) | 0.263 |
| 6-month follow up | 0.629(-0.727~1.986) | 0.363 | -0.274(-1.590~1.041) | 0.682 | -0.543(-1.899~0.814) | 0.432 | -0.903(-2.197~0.390) | 0.171 | -1.172(-2.503~0.159) | 0.084 | -0.268(-1.565~1.028) | 0.685 |
| **HADS-D, points** |  |  |  |  |  |  |  |  |  |  |  |  |
| Baseline | -0.756(-2.419~0.906) | 0.372 | -1.090(-2.713~0.533) | 0.188 | -0.880(-2.529~0.770) | 0.295 | -0.334(-1.969~1.302) | 0.689 | -0.123(-1.786~1.539) | 0.884 | 0.210(-1.420~1.841) | 0.800 |
| ICU discharge | -0.584(-2.057~0.890) | 0.437 | 0.362(-1.077~1.801) | 0.621 | -0.739(-2.200~0.721) | 0.321 | 0.946(-0.477~2.368) | 0.192 | -0.156(-1.601~1.290) | 0.832 | -1.102(-2.519~0.316) | 0.128 |
| Hospital discharge | -1.196(-2.524~0.133) | 0.078 | -0.594(-1.879~0.690) | 0.364 | -1.921(-3.232~-0.609) | **0.004** | 0.601(-0.686~1.889) | 0.359 | -0.725(-2.039~0.590) | 0.279 | -1.326(-2.605~-0.047) | **0.042** |
| 1-month follow up | -0.851(-2.149~0.446) | 0.198 | -0.656(-1.934~0.621) | 0.313 | -1.139(-2.423~0.145) | 0.082 | 0.195(-1.069~1.459) | 0.762 | -0.288(-1.559~0.983) | 0.657 | -0.483(-1.741~0.775) | 0.451 |
| 6-month follow up | 0.487(-1.045~2.019) | 0.533 | -0.289(-1.776~1.198) | 0.703 | 0.019(-1.512~1.551) | 0.980 | -0.776(-2.237~0.684) | 0.297 | -0.467(-1.969~1.035) | 0.541 | 0.309(-1.156~1.773) | 0.679 |
| **IESR, points** |  |  |  |  |  |  |  |  |  |  |  |  |
| 1-month follow up | -2.108(-4.884~0.668) | 0.136 | -1.794(-4.495~0.907) | 0.192 | -1.254(-3.979~1.471) | 0.365 | 0.314(-2.399~3.028) | 0.819 | 0.854(-1.872~3.580) | 0.537 | 0.540(-2.135~3.215) | 0.691 |
| 6-month follow up | 0.692(-2.458~3.842) | 0.665 | 1.003(-2.032~4.038) | 0.515 | 0.305(-2.804~3.415) | 0.846 | 0.311(-2.703~3.325) | 0.839 | -0.386(-3.454~2.682) | 0.804 | -0.697(-3.681~2.286) | 0.645 |
| **SF-36, points** |  |  |  |  |  |  |  |  |  |  |  |  |
| 1-month follow up | 60.087(-15.76~135.93) | 0.120 | 40.975(-32.10~114.05) | 0.270 | 81.103(7.428~154.78) | **0.031** | -19.11(-93.61~55.380) | 0.613 | 21.016(-53.81~95.845) | 0.580 | 40.128(-32.79~113.05) | 0.279 |
| 6-month follow up | 22.063(-59.97~104.10) | 0.596 | 15.961(-61.53~93.452) | 0.685 | 50.921(-29.41~131.25) | 0.213 | -6.102(-85.20~72.998) | 0.879 | 28.858(-52.71~110.42) | 0.486 | 34.960(-43.06~112.98) | 0.378 |

RT=resistance training; HMB = β-hydroxy-β-methylbutyrate; LS mean = least squares mean; MRC = Medical Research Council muscle strength scale; IMS = ICU Mobility Scale; FSS-ICU = Functional Status Score for the ICU; FS-14 = Fatigue Scale–14; PSQI = Pittsburgh Sleep Quality Index. FFM = fat-free mass; ASMM = appendicular skeletal muscle mass; SMI = skeletal muscle index; PhA = phase angle; MMSE = Mini-Mental State Examination; HADS-A = Hospital Anxiety and Depression Scale–Anxiety subscale; HADS-D = Hospital Anxiety and Depression Scale–Depression subscale. IES-R = Impact of Event Scale–Revised; SF-36 = Short Form–36 Health Survey. Adjusted for age, sex, BMI, APACHE II score, and duration of mechanical ventilation.
